# Supplementary material for: Tumor-Infiltrating Lymphocytes (TILs) in Epithelial Ovarian Cancer: Heterogeneity, Prognostic Impact, and Relationship with Immune Checkpoints
Source: MDPI journal article supplement (doi:10.3390/cancers14215332), 2022-10-29
Supplement: s1 [file s1]

## Supplementary Materials File S1. Search strategy

MEDLINE with OVID:

exp Tumor Microenvironment/ or exp CD8-Positive T-Lymphocytes/ or exp Lymphocytes,Tumor-Infiltrating/ or exp T-Lymphocytes/ or ("tumor\* microenvironment\*" or "T Lymphocyte\*" or "CD8-Positive T-lymphocyte\*").ab,kf,ti. or exp CD4-Positive T-Lymphocytes/ or exp B-Lymphocytes/ or exp T-Lymphocytes, Helper-Inducer/ or exp T-Lymphocytes, Regulatory/ or ("CD4-Positive T-Lymphocyte\*" or "immuncheckpoint\*" or "B-Lymphocyte\*" or "follicular helper" or "follicular helper T" or "lymphocyte\* regulator\*" or "regulator\* T" or "tfh" or "th1" or "th2" or "th17" or "treg" or "tils").ab,kf,ti.

AND

exp Ovarian Neoplasms/ or exp Carcinoma, Ovarian Epithelial/ or ("ovarian\* neoplasm\*" or "ovarian\* cancer\*" or "epithelial\* ovarian\* cancer\*" or "high grade serous ovarian cancer\*" or "low grade serous ovarian cancer\*" or "endometrioid ovarian cancer\*" or "clear\* cell\* ovarian cancers\*" or "mucinous ovarian cancer\*" or "ovarian carcinosarcoma").ab,kf,ti.

EMBASE:

'tumor microenvironment'/exp/mj OR 'CD8+ T lymphocyte'/exp/mj OR 'tumor associated leukocyte'/exp/mj OR 'CD4+ T lymphocyte'/exp/mj OR 'helper cell'/exp/mj OR 'Th1 cell'/exp/mj OR 'Th2 cell'/exp/mj OR 'Th17 cell'/exp/mj OR 'regulatory T lymphocyte'/exp/mj OR 'B lymphocyte'/exp/mj OR ('cd4-positive t-lymphocyte\*' OR 'immuncheckpoint\*' OR 'b-lymphocyte\*' OR 'follicular helper' OR 'follicular helper t' OR 'tumor\* microenvironment\*' OR 't lymphocyte\*' OR 'lymphocyte\* regulator\*' OR 'regulator\* t' OR 'cd8-positive t-lymphocyte\*' OR 'tfh' OR 'th1' OR 'th2' OR 'th17' OR 'treg' OR 'tils'):ti,ab,kw

AND

'ovary carcinoma'/exp/mj OR 'high grade serous ovarian cancer'/exp OR 'ovary tumor'/exp/mj OR 'low grade serous ovarian cancer'/exp OR 'endometrioid ovarian cancer'/exp OR 'clear cell ovarian cancer'/exp OR 'mucinous ovarian cancer'/exp OR 'ovarian carcinosarcoma'/exp OR ('ovarian\* neoplasm\*' OR 'ovarian\* cancer\*' OR 'epithelial\* ovarian\* cancer\*' OR 'high grade serous ovarian cancer\*' OR 'low grade serous ovarian cancer\*' OR 'endometrioid ovarian cancer\*' OR 'clear\* cell\* ovarian cancers\*' OR 'mucinous ovarian cancer\*' OR 'ovarian carcinosarcoma'):ti,ab,kw
